# Supplementary material for: Plasma metabolomics study reveals the critical metabolic signatures for benzene-induced hematotoxicity
Source: PubMed Central journal article supplement (PMC8855792; doi:10.1172/jci.insight.154999), 2022-01-25
Supplement: jciinsight-7-154999-s132.pdf [file jciinsight-7-154999-s132.pdf]

# Supplementary Materials

## **Plasma metabolomics study reveals the critical metabolic signatures for benzene-induced hematotoxicity**

Xiaoli Guo,<sup>1,2#</sup> Lei Zhang,<sup>1,2#</sup> Jingyu Wang,<sup>1,2</sup> Wei Zhang,<sup>1,2</sup> Jing Ren,<sup>1,2</sup> Yujiao Chen,<sup>1,2</sup> Yanlin Zhang,<sup>3\*</sup> and Ai Gao<sup>1,2\*</sup>

<sup>1</sup>Department of Occupational Health and Environmental Health, School of Public Health, Capital Medical University, Beijing 100069, P. R. China

<sup>2</sup>Beijing Key Laboratory of Environmental Toxicology, Capital Medical University, Beijing 100069, P. R. China

<sup>3</sup>Research Center of Occupational Medicine, Peking University Third Hospital, 49 North Garden Road, Haidian District, Beijing 100191, P. R. China

#Those authors contributed equally to this work.

Correspondence Authors: Prof. Ai Gao, Department of Occupational Health and Environmental Health, School of Public Health, Capital Medical University, Beijing 100069, P. R. China, Tel: 86-10-83911509 and Dr. Yanlin Zhang, Research Center of Occupational Medicine, Peking University Third Hospital, Beijing 100191, P.R. China.

Email: gaoai0980@163.com (A. Gao), zhangyanlin@bjmu.edu.cn (Y. Zhang).

# 1 **Supplementary materials and methods**

## 2 **Chemicals and Reagents**

3 All the 400 standards were obtained from Sigma-Aldrich (St. Louis, MO, USA), Steraloids Inc.  
4 (Newport, RI, USA) and TRC Chemicals (Toronto, ON, Canada). All the standards were accurately  
5 weighed and prepared in water, methanol, sodium hydroxide solution, or hydrochloric acid solution  
6 to obtain individual stock solution at a concentration of 5.0 mg/mL. Appropriate amount of each  
7 stock solution was mixed to create stock calibration solutions. Formic acid was of analytical grade  
8 and obtained from Sigma-Aldrich (St. Louis, MO, USA). Methanol (Optima LC-MS), acetonitrile  
9 (Optima LC-MS), and isopropanol (Optima LC-MS) were purchased from Thermo-Fisher Scientific  
10 (FairLawn, NJ, USA). Ultrapure water was produced by a Mill-Q Reference system equipped with  
11 a LC-MS Pak filter (Millipore, Billerica, MA, USA).

## 12 **Urine benzene and xylenes metabolite detection**

13 In this experiment, xevotq-s high performance liquid chromatography-tandem four-stage bar mass  
14 spectrometry (UPLC-MS/MS, Waters) was used to detect urine benzene and xylenes metabolites.  
15 Prior to analysis, take out urine samples and leave it on ice to thaw slowly. Then, the urine sample  
16 was centrifuged at 13,000 g at 10°C for 10 min. Subsequently, 80 µL standard and urine supernatant  
17 were taken, and 720 µL 10% formic acid solution was added to acidify (PH about 2). The solid-  
18 phase extraction column of Oasis MAX 96-well Plates was activated and balanced successively  
19 with 1mL methanol and 1ml deionized water, and then 800 µL acidified samples were added. Wash  
20 with 1 mL methanol solution containing 50 mM sodium acetate (5:95), elute the neutral substance  
21 with 1 mL methanol, and discard the eluent. 1ml methanol solution containing 2% formic acid was  
22 eluted for 2 times, combined with 2 times eluent and centrifuged for drying. The solution was

23 redisclosed with 160  $\mu$ L 15 mM ammonium acetate solution and transferred to 350  $\mu$ L 96-well plate.  
24 It was oscillated at 650 rpm for 10min at 10°C, then centrifuged at 4000 g for 10 min at 4°C,  
25 transferred 100  $\mu$ L supernatant to another 96-well plate, and waited for detection. The parameters  
26 and methods of the instrument are set as shown in Table S5. There is reagent blank, system blank  
27 and system balance biological sample before and after sample analysis of each batch. The addition  
28 of these quality controls also monitors possible contamination and data quality during the analysis.  
29 In order to eliminate errors caused by the sequence of analysis process, samples to be tested were  
30 randomly measured according to group information. QC samples and blank samples are interspersed  
31 in the whole sample for testing. The raw data generated by UPLC-MS/MS will adopt QuanMET  
32 software (v1.0, Metabo-profile, Shanghai, China) perform peak integration, correction and  
33 quantitative analysis for each metabolite.

#### 34 **Plasma metabolomics analysis**

35 Plasma sample used to assess individual metabolite including amino acids, organic acids, amines,  
36 fatty acids, carbohydrates, and bile acids which performed on an ultra-performance liquid  
37 chromatography coupled to tandem mass spectrometry (UPLC-MS/MS) system. Briefly, samples  
38 were thawed on ice-bath to diminish sample degradation. 25  $\mu$ L of plasma was added to a 96-well  
39 plate and the plate was transferred to the Biomek 4000 workstation (Biomek 4000, USA). Ice cold  
40 methanol with internal standards was automatically added to each sample and vortexed for 5 min.  
41 Then the plate was centrifuged at 4000 g for 30 min (Allegra X-15R, USA). 30  $\mu$ L of supernatant  
42 was transferred to a clean 96-well plate, and 20 $\mu$ L of freshly prepared derivative reagents was added  
43 to each well. The plate was sealed and carried out at 30°C for 60 min. After derivatization, 350  $\mu$ L  
44 of ice-cold 50% methanol solution was added to dilute the sample and the plate was stored at -20°C

45 for 20 min and followed by 4000 g centrifugation at 4°C for 30 min. 135 µL of supernatant was  
46 transferred to a new 96-well plate with 15 µL internal standards in each well. Serial dilutions of  
47 derivatized stock standards were added to the left wells. Finally, the plate was sealed for UPLC-  
48 MS/MS analysis.

49 An ultra-performance liquid chromatography coupled to tandem mass spectrometry system  
50 (ACQUITY UPLC-Xevo TQ-S, USA) was used to measure the metabolites. The instrumental  
51 parameters of the analysis were set as shows in Table S5. A standard calibration solution with more  
52 than 300 standards at 7 different concentration levels were analyzed to construct the calibration  
53 curve. Peak annotation and quantitation were conducted by TargetLynx application manager (Waters  
54 Corp., Milford, MA, United States). Internal standards were added to the test samples in order to  
55 monitor analytical variations during the entire sample preparation and analysis processes.

#### 56 **Basis for selection of exposure time and dose in animal experiments**

57 The hematopoietic system is a recognized target of benzene exposure. Long-term chronic  
58 benzene exposure could inhibit the renewal and differentiation of BM HSCs, ultimately resulting in  
59 altered hematology (1). To investigate the changes in metabolite profiles at different stages of  
60 benzene exposure-induced hematotoxicity, mice were treated with subcutaneous injections of 125  
61 mg/kg of benzene for 15, 30 and 45 days. Respiratory inhalation and dermal contact are the two  
62 main pathways of benzene exposure in humans (2). Therefore, dynamic inhalation and subcutaneous  
63 injection are widely used in animal experiments. In the pre-experiments of our group, it was found  
64 that the ratio of mixed gas and pure gas in the dynamic inhalation device was unstable at low-level  
65 benzene, which might lead to the system error of benzene exposure concentration. In addition, real-  
66 time benzene exposure concentrations in the contaminated room were monitored by activated

67 carbon adsorption-CS<sub>2</sub> desorption combined with gas chromatography, which is a complex and  
68 time-consuming procedure  
69 (<http://www.nhc.gov.cn/wjw/pyl/201712/0c849c68aa9b48549056712aea6f97b9.shtml>). Compared  
70 to dynamic inhalation, subcutaneous injection is convenient and allows the injection of accurate  
71 doses by calculation to mice. In addition, the choice of dose is critical to the success of a mouse  
72 model of benzene exposure-induced hematotoxicity. Previous literature on benzene exposure in  
73 mice indicated that subcutaneous administration of 150 mg/kg benzene for 30 days had been  
74 acknowledged by numerous researchers due to its stable and reproducible hematotoxicity (3, 4).  
75 Therefore, our current experimental dose was close to the previous studies, and a mouse model of  
76 benzene-induced hematotoxicity had been successfully constructed at this dose. In traditional  
77 toxicology, about 1/10 of the mouse life span (1-2 years) is considered a subchronic toxicity cycle.  
78 Therefore, the 30-day exposure period was widely used in in vivo studies in benzene exposure-  
79 induced hematotoxicity (4, 5). However, it is not clear whether there are dynamic changes in  
80 hematotoxicity and metabolic disorders due to benzene exposure during different exposure periods.  
81 Taken together, subcutaneous injections of 125 mg/kg benzene for 15, 30 and 45 days were selected  
82 in our subsequent animal experiments.  
83

**Table S1. Comparisons of urinary benzenes metabolites, whole blood cells, and liver function parameters between two groups**

| Effect indicators                      | Gender | Control group (n=76) |                        |               | Benzene-exposed group (n=86) |                        |               | p                  | q     |
|----------------------------------------|--------|----------------------|------------------------|---------------|------------------------------|------------------------|---------------|--------------------|-------|
|                                        |        | Mean ± SD            | Median (IQR)           | Min-Max       | Mean ± SD                    | Median (IQR)           | Min-Max       |                    |       |
| Urinary benzene and xylene metabolites |        |                      |                        |               |                              |                        |               |                    |       |
| SPMA (µg/g Cr)                         | ALL    | 0.57 ± 0.92          | 0.12 (0.002-0.87)      | 0.001-5.22    | 0.97 ± 0.98                  | 0.78 (0.14-1.45)       | 0.002-3.76    | 0.003 <sup>b</sup> | 0.012 |
|                                        | Male   | 0.58 ± 0.94          | 0.18 (0.001-0.76)      | 0.001-5.22    | 0.95 ± 0.93                  | 0.82 (0.14-1.44)       | 0.002-3.76    | 0.005 <sup>b</sup> | 0.024 |
|                                        | Female | 0.55 ± 0.76          | 0.01 (0.002-1.45)      | 0.001-1.73    | 1.53 ± 1.46                  | 1.13 (0.20-3.11)       | 0.09-3.69     | 0.126 <sup>b</sup> | 0.146 |
| tt-MA (µg/g Cr)                        | ALL    | 290.59 ± 129.14      | 267.28 (218.51-334.07) | 67.90-635.93  | 252.55 ± 153.95              | 249.86 (163.96-314.89) | 58.53-1130.45 | 0.040 <sup>b</sup> | 0.085 |
|                                        | Male   | 267.84 ± 86.75       | 257.77 (217.07-321.82) | 67.90-635.93  | 252.63 ± 156.30              | 246.04 (164.09-312.62) | 58.53-1130.45 | 0.170 <sup>b</sup> | 0.170 |
|                                        | Female | 459.94 ± 240.12      | 348.82 (334.97-525.00) | 250.28-568.02 | 257.39 ± 122.92              | 262.45 (120.77-376.41) | 116.19-362.33 | 0.059 <sup>b</sup> | 0.109 |
| 2-MHA (µg/g Cr)                        | ALL    | 229.11 ± 172.86      | 206.35 (98.93-334.65)  | 63.70-695.68  | 369.42 ± 789.24              | 178.91 (81.94-361.56)  | 40.45-1089.38 | 0.929 <sup>b</sup> | 0.413 |
|                                        | Male   | 233.70 ± 170.49      | 221.32 (96.83-337.22)  | 63.70-628.64  | 382.23 ± 808.32              | 179.56 (85.26-378.10)  | 40.45-1089.38 | 0.855 <sup>b</sup> | 0.352 |
|                                        | Female | 194.97 ± 197.06      | 119.91 (98.36-212.19)  | 85.23-695.67  | 215.10 ± 241.220             | 138.54 (82.10-308.35)  | 42.70-178.91  | 0.926 <sup>b</sup> | 0.401 |
| 3-MHA (µg/g Cr)                        | ALL    | 475.80 ± 382.40      | 422.50 (155.20-757.45) | 67.99-1377.10 | 577.29 ± 712.66              | 241.66 (135.42-855.74) | 47.81-2048.83 | 0.804 <sup>b</sup> | 0.328 |
|                                        | Male   | 493.34 ± 398.28      | 425.58 (139.69-831.10) | 67.99-1377.10 | 597.70 ± 726.06              | 276.36 (133.10-866.23) | 47.81-2048.83 | 0.883 <sup>b</sup> | 0.364 |
|                                        | Female | 345.19 ± 201.08      | 309.06 (159.33-497.13) | 154.07-711.15 | 472.12 ± 711.34              | 206.93 (135.80-661.48) | 143.49-241.66 | 0.480 <sup>b</sup> | 0.243 |
| Blood parameters                       |        |                      |                        |               |                              |                        |               |                    |       |
| WBC (*10 <sup>9</sup> /L)              | ALL    | 6.74 ± 1.54          | 6.58 (5.55-7.95)       | 4.57-12.21    | 6.10 ± 1.10                  | 5.95 (5.36-6.97)       | 4.07-8.78     | 0.014 <sup>a</sup> | 0.049 |
|                                        | Male   | 6.76 ± 1.55          | 6.64 (5.58-7.97)       | 4.57-12.21    | 6.01 ± 1.01                  | 5.91 (5.36-6.83)       | 4.07-8.17     | 0.005 <sup>a</sup> | 0.036 |
|                                        | Female | 6.64 ± 1.53          | 6.27 (5.41-7.80)       | 4.74-9.40     | 6.55 ± 1.65                  | 6.73 (4.80-7.97)       | 4.48-8.78     | 0.906 <sup>a</sup> | 0.388 |
| NEUT (*10 <sup>9</sup> /L)             | ALL    | 3.81 ± 1.21          | 3.54 (3.01-4.50)       | 2.02-8.51     | 3.76 ± 1.29                  | 3.66 (2.84-4.35)       | 1.46-9.12     | 0.897 <sup>a</sup> | 0.376 |
|                                        | Male   | 3.80 ± 1.22          | 3.54 (3.01-4.50)       | 2.02-8.51     | 3.78 ± 1.31                  | 3.66 (2.86-4.39)       | 1.46-9.12     | 0.948 <sup>a</sup> | 0.425 |
|                                        | Female | 3.96 ± 1.17          | 3.73 (3.07-4.47)       | 2.70-6.42     | 3.49 ± 1.11                  | 3.44 (2.59-4.47)       | 1.99-4.99     | 0.651 <sup>a</sup> | 0.267 |
| LYMPH (*10 <sup>9</sup> /L)            | ALL    | 2.31 ± 0.53          | 2.23 (1.86-2.74)       | 1.19-3.48     | 2.28 ± 0.56                  | 2.18 (1.82-2.77)       | 1.31-3.83     | 0.641 <sup>a</sup> | 0.255 |
|                                        | Male   | 2.35 ± 0.53          | 2.43 (1.90-2.76)       | 1.19-3.47     | 2.29 ± 0.56                  | 2.18 (1.86-2.78)       | 1.31-3.83     | 0.425 <sup>a</sup> | 0.219 |
|                                        | Female | 2.03 ± 0.52          | 1.95 (1.73-2.15)       | 1.46-3.28     | 2.18 ± 0.68                  | 2.10 (1.63-2.62)       | 1.45-3.33     | 0.724 <sup>a</sup> | 0.279 |

|                            |        |                |                        |               |                |                        |               |                    |       |
|----------------------------|--------|----------------|------------------------|---------------|----------------|------------------------|---------------|--------------------|-------|
| PLT (*10 <sup>9</sup> /L)  | ALL    | 267.27 ± 56.69 | 265.00 (240.00-292.00) | 155.00-461.00 | 250.29 ± 52.4  | 250 (217.25-278)       | 120.00-399.00 | 0.051 <sup>a</sup> | 0.097 |
|                            | Male   | 267.21 ± 58.63 | 263.00 (238.50-292.50) | 155.00-461.00 | 250.10 ± 52.61 | 251.50 (251.5-277.50)  | 120.00-399.00 | 0.084 <sup>a</sup> | 0.121 |
|                            | Female | 267.67 ± 42.32 | 42.32 (245.50-297.00)  | 178.00-325.00 | 252.83 ± 54.22 | 241.00 (205.50-303.25) | 195.00-340.00 | 0.443 <sup>a</sup> | 0.231 |
| HGB (g/L)                  | ALL    | 157.08 ± 13.10 | 159.00 (151.00-165.00) | 123.00-188.00 | 158.70 ± 11.07 | 160.00 (153.00-165.00) | 116.00-184.00 | 0.377 <sup>a</sup> | 0.206 |
|                            | Male   | 160.03 ± 10.37 | 160.00 (154.00-166.50) | 128.00-188.00 | 158.64 ± 10.22 | 160.00 (153.25-164.75) | 116.00-178.00 | 0.751 <sup>a</sup> | 0.291 |
|                            | Female | 135.44 ± 10.66 | 133.00 (129.00-138.50) | 123.00-160.00 | 159.50 ± 20.72 | 163.00 (163.00-178.75) | 133.00-184.00 | 0.015 <sup>a</sup> | 0.061 |
| RBC (*10 <sup>12</sup> /L) | ALL    | 5.16 ± 0.45    | 5.14 (4.95-5.40)       | 4.04-6.36     | 5.19 ± 0.37    | 5.21 (5.03-5.42)       | 4.03-5.90     | 0.300 <sup>a</sup> | 0.182 |
|                            | Male   | 5.25 ± 0.38    | 5.19 (5.01-5.44)       | 4.31-6.36     | 5.20 ± 0.33    | 5.21 (5.03-5.41)       | 4.03-5.90     | 0.976 <sup>a</sup> | 0.437 |
|                            | Female | 4.51 ± 0.31    | 4.48 (4.29-4.78)       | 4.04-5.00     | 5.09 ± 0.67    | 5.20 (4.34-5.72)       | 4.20-5.86     | 0.099 <sup>a</sup> | 0.134 |
| Liver function parameters  |        |                |                        |               |                |                        |               |                    |       |
| AST (U/L)                  | ALL    | 22.87 ± 13.16  | 20.50 (17.00-26.00)    | 13.00-41.00   | 22.56 ± 9.78   | 21.00 (17.00-25.00)    | 13.00-44.00   | 0.778 <sup>a</sup> | 0.316 |
|                            | Male   | 23.61 ± 13.81  | 21.00 (17.00-26.00)    | 13.00-41.00   | 22.73 ± 10.08  | 21.00 (17.00-25.00)    | 13.00-44.00   | 0.755 <sup>a</sup> | 0.303 |
|                            | Female | 17.33 ± 3.04   | 16.00 (14.50-20.50)    | 14.00-22.00   | 20.33 ± 3.56   | 20.50 (18.00-22.25)    | 15.00-26.00   | 0.154 <sup>a</sup> | 0.158 |
| ALT (U/L)                  | ALL    | 29.85 ± 21.38  | 24.00 (15.00-37.00)    | 5.00-126.00   | 29.38 ± 23.13  | 23.50 (15.00-37.00)    | 7.00-170.00   | 0.837 <sup>a</sup> | 0.340 |
|                            | Male   | 32.03 ± 21.66  | 27.00 (17.00-39.50)    | 8.00-126.00   | 39.50 ± 23.84  | 23.50 (15.00-37.00)    | 7.00-170.00   | 0.330 <sup>a</sup> | 0.194 |
|                            | Female | 13.89 ± 9.45   | 12.00 (8.00-15.50)     | 5.00-37.00    | 22.50 ± 7.58   | 22.50 (16.00-27.50)    | 13.00-35.00   | 0.034 <sup>a</sup> | 0.073 |

Normality distributions of all variables were checked by the Kolmogorov-Smirnov tests.

a: Student's t-test; b: Mann-Whitney U test.

p<0.05 indicates that the difference is statistically significant; q-value is adjusted p-value using FDR. Bold: q-value < 0.25.

Abbreviation: urinary benzene metabolite S-phenylmercapturic acid (SPMA) and trans,trans-muconic acid (tt-MA); xylene metabolite 2-methylhippuric acid (2-MHA) and 3-mercaptohexyl acid, 3-MHA; Routine blood , white blood cell (WBC), neutrophile granulocyte (NEUT), lymphocyte (LYMPH), blood platelet (PLT), hemoglobin (HGB), and red blood cell (RBC); Hepatic function index, aspartic transaminase (AST) and glutamic-pyruvic transaminase (ALT).

**Table S2. Comparisons of 28 plasma differential metabolites levels between benzene-exposed workers and healthy controls (µmol/L)**

| Class                 | Metabolite             | HMDB    | Healthy control (n=76) |                     | Benzene-exposed worker (n=86) |                     | FC   | p     | q     |
|-----------------------|------------------------|---------|------------------------|---------------------|-------------------------------|---------------------|------|-------|-------|
|                       |                        |         | Median                 | IQR (P25-P75)       | Median                        | IQR (P25-P75)       |      |       |       |
| SCFAs                 | Butyric acid           | 0000039 | 3.948                  | (2.969, 5.192)      | 4.710                         | (3.586, 6.026)      | 1.19 | 0.026 | 0.289 |
| SCFAs                 | Isobutyric acid        | 0001873 | 4.530                  | (3.447, 6.862)      | 5.464                         | (4.191, 8.020)      | 1.21 | 0.043 | 0.328 |
| Phenylpropanoic Acids | Phenyllactic acid      | 0000779 | 0.015                  | (0.008, 0.024)      | 0.019                         | (0.011, 0.030)      | 1.27 | 0.034 | 0.298 |
| Peptides              | Glycylproline          | 0000721 | 0.073                  | (0.070, 0.077)      | 0.076                         | (0.071, 0.079)      | 1.04 | 0.024 | 0.280 |
| Organic Acids         | Pyruvic acid           | 0000243 | 119.005                | (90.081, 140.801)   | 93.989                        | (72.846, 122.038)   | 0.79 | 0.001 | 0.106 |
| Organic Acids         | cis-Aconitic acid      | 0000072 | 4.853                  | (4.260, 5.463)      | 5.276                         | (4.595, 5.962)      | 1.09 | 0.012 | 0.203 |
| Organic Acids         | Oxoglutaric acid       | 0000208 | 16.590                 | (11.099, 26.027)    | 13.196                        | (9.554, 19.838)     | 0.80 | 0.014 | 0.208 |
| Fatty Acids           | Oleic acid             | 0000207 | 1222.356               | (983.106, 1506.540) | 1076.129                      | (933.777, 1218.446) | 0.88 | 0.001 | 0.106 |
| Fatty Acids           | 10Z-Heptadecenoic acid | 0060038 | 4.843                  | (3.603, 8.004)      | 3.900                         | (2.791, 5.423)      | 0.81 | 0.002 | 0.106 |
| Fatty Acids           | Palmitoleic acid       | 0003229 | 76.984                 | (49.210, 111.200)   | 54.566                        | (36.262, 80.827)    | 0.71 | 0.002 | 0.106 |
| Fatty Acids           | DHA                    | 0002183 | 156.201                | (116.529, 210.356)  | 130.661                       | (101.871, 158.341)  | 0.84 | 0.003 | 0.107 |
| Fatty Acids           | Myristoleic acid       | 0002000 | 0.227                  | (0.146, 0.390)      | 0.158                         | (0.090, 0.255)      | 0.70 | 0.003 | 0.107 |
| Fatty Acids           | Dodecanoic acid        | 0000638 | 0.754                  | (0.609, 1.045)      | 0.609                         | (0.504, 0.822)      | 0.81 | 0.004 | 0.107 |
| Fatty Acids           | Myristic acid          | 0000806 | 17.651                 | (13.217, 23.502)    | 15.048                        | (11.544, 18.239)    | 0.85 | 0.006 | 0.160 |
| Fatty Acids           | Linoleic acid          | 0000673 | 512.643                | (445.400, 624.669)  | 462.359                       | (417.236, 534.033)  | 0.90 | 0.007 | 0.164 |
| Fatty Acids           | 2-Butenoic acid        | 0010720 | 3.887                  | (3.019, 5.642)      | 4.629                         | (3.624, 6.226)      | 1.19 | 0.031 | 0.298 |
| Fatty Acids           | DPA                    | 0006528 | 7.880                  | (6.099, 11.092)     | 7.063                         | (5.900, 8.570)      | 0.90 | 0.038 | 0.309 |
| Fatty Acids           | Eicosadienoic acid     | 0005060 | 185.059                | (136.639, 236.277)  | 153.743                       | (124.776, 195.820)  | 0.83 | 0.044 | 0.328 |
| Carboxylic acids      | trans_Aconitic acid    | 0000958 | 6.665                  | (5.796, 7.675)      | 7.303                         | (6.442, 8.419)      | 1.10 | 0.014 | 0.208 |
| Carbohydrates         | Xylose                 | 0000098 | 2.075                  | (1.726, 2.309)      | 1.829                         | (1.582, 2.155)      | 0.88 | 0.010 | 0.184 |
| Carbohydrates         | Threonic acid          | 0000943 | 1.121                  | (0.955, 1.321)      | 0.971                         | (0.756, 1.273)      | 0.90 | 0.034 | 0.298 |
| Carbohydrates         | Trehalose              | 0000975 | 18.177                 | (17.073, 19.514)    | 19.128                        | (17.294, 20.278)    | 1.04 | 0.037 | 0.309 |
| Amino Acids           | Homoserine             | 0000719 | 0.972                  | (0.838, 1.201)      | 1.126                         | (0.931, 1.298)      | 1.16 | 0.010 | 0.184 |



|             |                         |         |        |                  |        |                  |      |       |       |
|-------------|-------------------------|---------|--------|------------------|--------|------------------|------|-------|-------|
| Amino Acids | alpha-Aminobutyric acid | 0000452 | 0.669  | (0.501, 0.889)   | 0.580  | (0.432, 0.711)   | 0.87 | 0.017 | 0.229 |
| Amino Acids | Asparagine              | 0000168 | 76.771 | (70.801, 84.959) | 80.472 | (73.528, 88.920) | 1.05 | 0.031 | 0.298 |
| Amino Acids | Aminoadipic acid        | 0000510 | 1.9165 | (1.032, 2.612)   | 1.338  | (0.880, 1.980)   | 0.70 | 0.032 | 0.298 |
| Amino Acids | Methionine              | 0000696 | 18.359 | (15.633, 21.534) | 19.764 | (17.181, 23.078) | 1.08 | 0.049 | 0.354 |
| Alkylamines | Putrescine              | 0001414 | 0.051  | (0.030, 0.073)   | 0.040  | (0.017, 0.060)   | 0.78 | 0.023 | 0.280 |

Mann-Whitney-Wilcoxon (U-test) was performed to compare plasma differential metabolites levels between two group.

p < 0.05 indicates that the difference is statistically significant. q value is adjusted p-value using FDR. Bold: q value < 0.25.

Fold change (FC): the ratio of Exposeure/Control.

**Table S3. Associations of urinary benzenes metabolites with whole blood cell and liver function indexes with adjusting age, smoking, drinking, and BMI in subjects**

|       | Gender        | log SPMA                      |              |              | log tt-MA                |       |       | log 2-MHA                |       |       | log 3-MHA                    |              |       |
|-------|---------------|-------------------------------|--------------|--------------|--------------------------|-------|-------|--------------------------|-------|-------|------------------------------|--------------|-------|
|       |               | Adjusted $\beta$ (95%CI)      | p            | q            | Adjusted $\beta$ (95%CI) | p     | q     | Adjusted $\beta$ (95%CI) | p     | q     | Adjusted $\beta$ (95%CI)     | p            | q     |
| WBC   | <b>Male</b>   | <b>-0.33 (-0.52, -0.14)**</b> | <b>0.001</b> | <b>0.008</b> | -0.61 (-1.44, 0.21)      | 0.143 | 0.229 | -0.29 (-0.77, 0.2)       | 0.244 | 0.651 | <b>-0.77 (-1.39, -0.15)*</b> | <b>0.016</b> | 0.128 |
|       | Female        | -0.22 (-1.11, 0.66)           | 0.577        | 0.769        | 1.55 (-0.88, 3.98)       | 0.183 | 0.732 | -0.38 (-2.39, 1.64)      | 0.681 | 1.362 | 0.99 (-1.72, 3.69)           | 0.43         | 1.048 |
| NEUT  | Male          | -0.09 (-0.25, 0.08)           | 0.298        | 0.795        | -0.1 (-0.83, 0.63)       | 0.787 | 0.787 | 0.03 (-0.41, 0.46)       | 0.899 | 0.899 | -0.3 (-0.86, 0.25)           | 0.281        | 0.562 |
|       | Female        | 0.02 (-0.8, 0.83)             | 0.963        | 0.963        | 1.4 (-0.78, 3.59)        | 0.180 | 1.440 | -0.4 (-2.21, 1.41)       | 0.629 | 2.516 | 0.59 (-1.89, 3.08)           | 0.603        | 2.423 |
| LYMPH | Male          | -0.005 (-0.09, 0.08)          | 0.904        | 1.033        | -0.14 (-0.49, 0.21)      | 0.416 | 0.555 | -0.15 (-0.36, 0.06)      | 0.167 | 1.336 | <b>-0.3 (-0.57, -0.04)*</b>  | <b>0.025</b> | 0.100 |
|       | Female        | 0.16 (-0.15, 0.46)            | 0.285        | 0.456        | 0.23 (-0.97, 1.43)       | 0.679 | 0.905 | -0.08 (-0.99, 0.83)      | 0.848 | 1.131 | 0.16 (-1.1, 1.41)            | 0.278        | 0.516 |
| PLT   | Male          | -2.5 (-10.68, 5.67)           | 0.546        | 0.728        | -29.33 (-63.89, 5)       | 0.093 | 0.372 | -11.32 (-32.74, 10.11)   | 0.298 | 0.477 | -23.81 (-50.65, 3.02)        | 0.081        | 0.216 |
|       | Female        | 15.27 (-3.6, 34.14)           | 0.1          | 0.267        | 29.12 (-51.7, 109.93)    | 0.441 | 0.706 | 15.88 (-46.07, 77.82)    | 0.571 | 4.568 | 5.46 (-80.81, 91.73)         | 0.891        | 1.218 |
| HGB   | Male          | -0.1 (-1.75, 1.56)            | 0.909        | 0.909        | 2.06 (-4.96, 9.08)       | 0.563 | 0.643 | -0.48 (-4.81, 3.86)      | 0.828 | 0.946 | -0.38 (-5.87, 5.11)          | 0.89         | 1.017 |
|       | Female        | -0.53 (-11.11, 10.05)         | 0.912        | 1.042        | 21.8 (-14.73, 58.34)     | 0.213 | 0.568 | 6.3 (-23.29, 35.9)       | 0.645 | 1.720 | 25.28 (-11.7, 62.27)         | 0.159        | 1.793 |
| RBC   | Male          | -0.03 (-0.08, 0.03)           | 0.291        | 1.164        | 0.22 (-0.01, 0.44)       | 0.064 | 0.512 | 0.08 (-0.07, 0.22)       | 0.315 | 0.420 | 0.09 (-0.09, 0.27)           | 0.326        | 0.522 |
|       | Female        | 0.01 (-0.27, 0.29)            | 0.268        | 0.536        | 0.38 (-0.64, 1.39)       | 0.429 | 0.858 | -0.05 (-0.84, 0.74)      | 0.89  | 1.017 | 0.36 (-0.7, 1.41)            | 0.471        | 0.545 |
| AST   | Male          | 0.67 (-1.2, 2.53)             | 0.48         | 0.768        | 6.03 (-1.76, 13.81)      | 0.128 | 0.341 | 3.3 (-1.58, 8.18)        | 0.183 | 0.732 | 1.11 (-3.07, 5.29)           | 0.599        | 0.799 |
|       | <b>Female</b> | <b>1.64 (0.4, 2.87)*</b>      | <b>0.015</b> | 0.120        | -0.32 (-7.11, 6.48)      | 0.92  | 0.920 | 0.1 (-5.03, 5.24)        | 0.966 | 0.966 | -1.7 (-8.64, 5.24)           | 0.597        | 0.116 |
| ALT   | Male          | 0.61 (-2.69, 3.91)            | 0.368        | 0.736        | 10.48 (-3.32, 24.29)     | 0.135 | 0.270 | 5.1 (-3.53, 13.74)       | 0.244 | 0.488 | 0.04 (-10.01, 10.09)         | 0.994        | 0.994 |
|       | <b>Female</b> | <b>3.95 (0.29, 7.62)*</b>     | <b>0.037</b> | 0.148        | 1.71 (-16.45, 19.86)     | 0.838 | 0.958 | -1.96 (-15.63, 11.71)    | 0.756 | 1.210 | -1 (-19.84, 17.82)           | 0.907        | 0.179 |

Linear regression models of urinary benzenes metabolites with whole blood cell and liver function indexes after adjusting for age, BMI, smoking and alcohol consumption.

\*p < 0.05; \*\* p < 0.01; q value is adjusted p-value using FDR. Bold: q value < 0.25.

**Table S4. Correlation analysis of differential metabolites with hematological parameters and liver function parameters in all participants**

|                        | WBC     | NEUT  | LYMPH | PLT    | HGB    | RBC    | AST   | ALT   |
|------------------------|---------|-------|-------|--------|--------|--------|-------|-------|
| Oleic acid             | 0.32**  | 0.18* | -0.02 | 0.17*  | 0.25** | 0.23** | 0.07  | 0.16* |
| 10Z-Heptadecenoic acid | 0.32**  | 0.17* | 0.03  | 0.12   | 0.17*  | 0.12   | 0.08  | 0.19* |
| Palmitoleic acid       | 0.35**  | 0.18* | 0.03  | 0.17*  | 0.20*  | 0.13   | -0.06 | 0.08  |
| DHA                    | 0.262** | 0.11  | 0.00  | 0.04   | 0.24** | 0.21** | 0.01  | 0.11  |
| Myristoleic acid       | 0.32**  | 0.12  | 0.06  | 0.14   | 0.11   | 0.05   | -0.08 | 0.03  |
| Dodecanoic acid        | 0.25**  | 0.08  | 0.00  | 0.04   | 0.04   | -0.07  | -0.13 | -0.06 |
| Myristic acid          | 0.36**  | 0.18* | 0.09  | 0.06   | 0.20*  | 0.13   | 0.06  | 0.17* |
| Linoleic acid          | 0.24**  | 0.19* | -0.06 | 0.23** | 0.22** | 0.22** | 0.07  | 0.17* |

\*\* Significant correlation at the 0.01 level (two-tailed).

\* Significant correlation at the 0.05 level (two-tailed).

**Table S5. UPLC-TQMS instrument parameters settings (Urine benzene and xylenes metabolite detection)**

| UPLC                                 |                                                                                                                                                                      |
|--------------------------------------|----------------------------------------------------------------------------------------------------------------------------------------------------------------------|
| Column                               | ACQUITY UPLC UPLC@ HSS T3 1.8 $\mu$ m 2.1 mm $\times$ 100 mm                                                                                                         |
| Column Temp. ( $^{\circ}$ C)         | 40                                                                                                                                                                   |
| Sample Manager Temp. ( $^{\circ}$ C) | 10                                                                                                                                                                   |
| Mobile Phases                        | A=water+15 mM Ammonium acetate; B=acetonitrile                                                                                                                       |
| Gradient Conditions                  | 0-2 min (3-5% B), 2-3 min (5-10% B), 3-5 min (10-30% B), 5-6.5 min (30-40% B), 6.5-7 min (40-15% B), 7-7.5 min (15-10% B), 7.5-8 min (10-3% B), 7-7.5 min (15-10% B) |
| Flow Rate (mL/min)                   | 0.3                                                                                                                                                                  |
| Injection Vol. ( $\mu$ l)            | 5                                                                                                                                                                    |
| Flow Rate (mL/min)                   | 0.3                                                                                                                                                                  |
| Injection Vol. ( $\mu$ l)            | 5                                                                                                                                                                    |
| MASS SPECTROMETER                    |                                                                                                                                                                      |
| Capillary (kv)                       | 3.5 (ESI-)                                                                                                                                                           |
| Source Temp ( $^{\circ}$ C)          | 150                                                                                                                                                                  |
| Desolvation Temp ( $^{\circ}$ C)     | 550                                                                                                                                                                  |
| Desolvation Gas Flow (L/Hr)          | 1000                                                                                                                                                                 |

**Table S6. UPLC-TQMS instrument parameters settings (Plasma metabolomics analysis)**

---

| UPLC                                 |                                                                                                                                                          |
|--------------------------------------|----------------------------------------------------------------------------------------------------------------------------------------------------------|
| Column                               | ACQUITY UPLC BEH C18 1.7 $\mu$ M VanGuard pre-column (2.1 $\times$ 5 mm) and<br>ACQUITY UPLC BEH C18 1.7 $\mu$ M analytical column (2.1 $\times$ 100 mm) |
| Column Temp. ( $^{\circ}$ C)         | 40                                                                                                                                                       |
| Sample Manager Temp. ( $^{\circ}$ C) | 10                                                                                                                                                       |
| Mobile Phases                        | A=water with 0.1% formic acid; and B=acetonitrile/IPA (90:10)                                                                                            |
| Gradient Conditions                  | 0-1 min (5% B), 1-12 min (5-80% B), 12-15 min (80-95% B), 15-16 min<br>(95-100%B), 16-18 min (100%B), 18-18.1 min (100-5% B), 18.1-20 min<br>(5% B)      |
| Flow Rate (mL/min)                   | 0.4                                                                                                                                                      |
| Injection Vol. ( $\mu$ l)            | 5                                                                                                                                                        |
| MASS SPECTROMETER                    |                                                                                                                                                          |
| Capillary (kv)                       | 1.5 (ESI+), 2.0 (ESI-)                                                                                                                                   |
| Source Temp ( $^{\circ}$ C)          | 150                                                                                                                                                      |
| Desolvation Temp ( $^{\circ}$ C)     | 550                                                                                                                                                      |
| Desolvation Gas Flow (L/Hr)          | 1000                                                                                                                                                     |

---

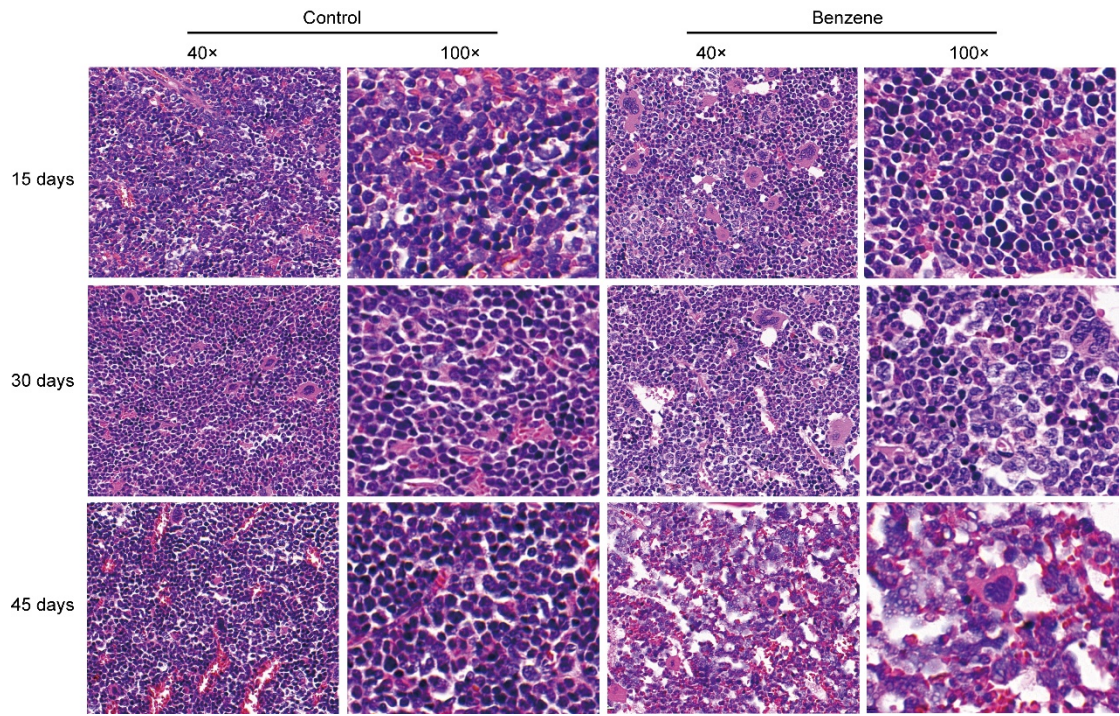

**Figure S1. Representative images of H&E staining of femur tissues in mice exposed to benzene for 15, 30 and 45 days (Magnification of 40× and 100×).**

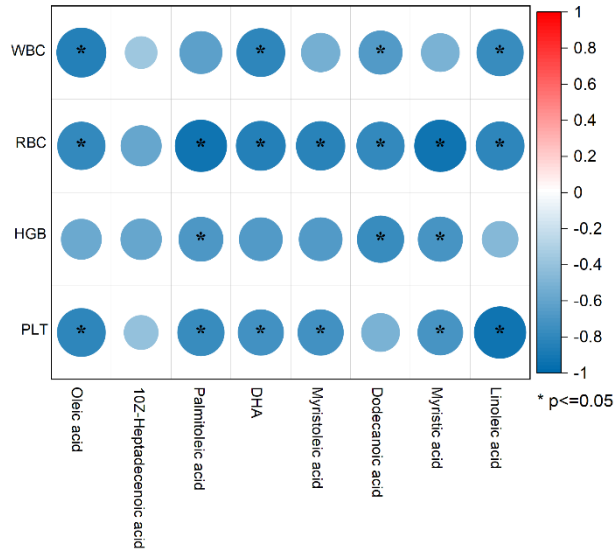

**Figure S2. Correlation of blood parameters (WBC, RBC, HGB, PLT) with differential fatty acids (Oleic acid, 10Z\_Heptadecenoic acid, Palmitoleic acid, DHA, Myristoleic acid, Dodecanoic acid, Myristic acid, Linoleic acid) in mice after 45 days of benzene exposure. \* p < 0.05.**

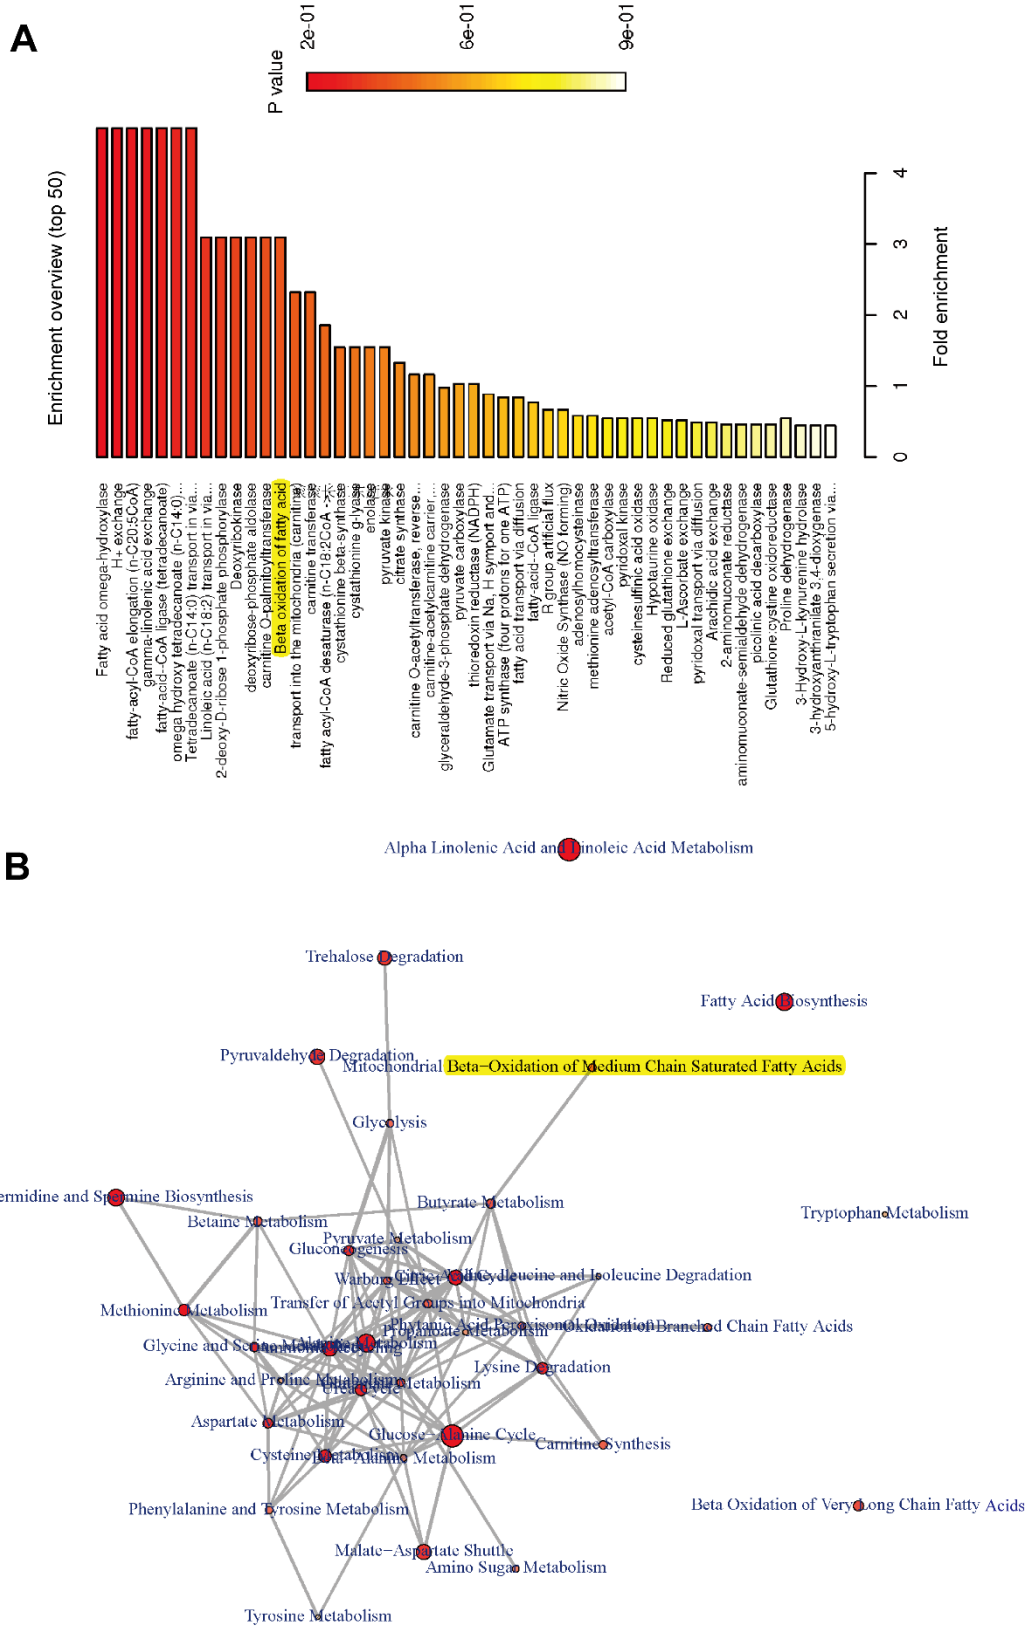

**Figure S3. Metabolite enrichment analysis. (A) Enrichment barplot based on KEGG database.**

**(B) MSEA network.**



## Reference

1. Lamm SH, and Grunwald HW. Benzene exposure and hematotoxicity. *Science*. 2006;312(5776):998–9.
2. Weisel CP. Benzene exposure: an overview of monitoring methods and their findings. *Chem Biol Interact*. 2010;184(1-2):58–66.
3. Sun R, Xu K, Ji S, Pu Y, Man Z, Ji J, et al. Benzene exposure induces gut microbiota dysbiosis and metabolic disorder in mice. *Sci Total Environ*. 2020;705:135879.
4. Sun R, Xu K, Ji S, Pu Y, Yu L, Yin L, et al. Toxicity in hematopoietic stem cells from bone marrow and peripheral blood in mice after benzene exposure: Single-cell transcriptome sequencing analysis. *Ecotoxicol Environ Saf*. 2021;207:111490.
5. Liang B, Chen Y, Yuan W, Qin F, Zhang Q, Deng N, et al. Down-regulation of miRNA-451a and miRNA-486-5p involved in benzene-induced inhibition on erythroid cell differentiation in vitro and in vivo. *Arch Toxicol*. 2018;92(1):259–72.
